# Supplementary material for: Diketopyrrolopyrrole-based polymer with a semi-fluorinated side chain for high-performance organic thin-film transistors
Source: Royal Society of Chemistry journal article supplement (doi:10.1039/c6ra05318a), 2016-01-01
Supplement: c6ra05318a1.pdf [file c6ra05318a1.pdf]

***Supporting information:***

Diketopyrrolopyrrole based polymers with semi-fluorinated side chain for  
high performance organic thin-film transistors

Kangjian Miao,<sup>†a</sup> Gil Jo Chae,<sup>†b</sup> Xiaoxue Wu,<sup>c</sup> Qinghai Shu,<sup>\*c</sup> Xin Zhu,<sup>a</sup> Bangjin Sun,<sup>a</sup> Jian Fan,<sup>\*a</sup> Shinuk Cho<sup>\*b</sup>

<sup>a</sup>Jiangsu Key Laboratory for Carbon-Based Functional Materials & Devices, Institute of Functional Nano & Soft Materials (FUNSOM), and Collaborative Innovation Center of Suzhou Nano Science and Technology, Soochow University, Suzhou, Jiangsu 215123, China

<sup>b</sup>Department of Physics and EHSRC, University of Ulsan, Ulsan 680-749, Republic of Korea

<sup>c</sup>School of Material Science and Engineering, Beijing Institute of Technology, 100081 Beijing, China



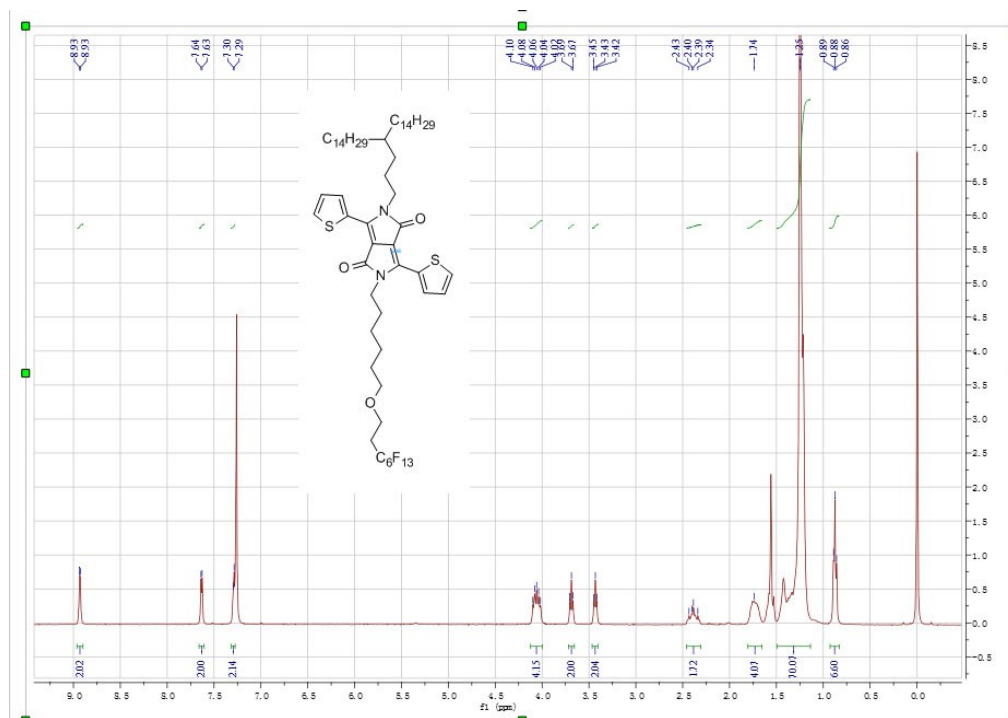

Figure S3  $^1H$  NMR spectrum of compound 2 (CDCl<sub>3</sub>).

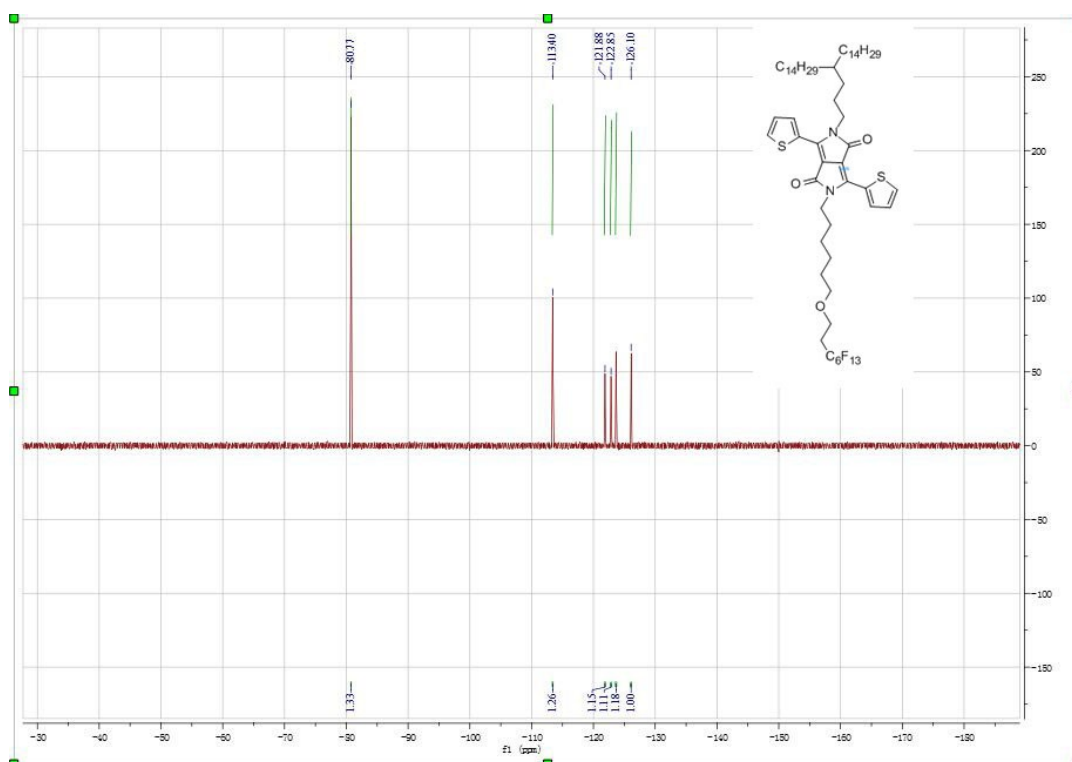

Figure S4  $^{19}F$  NMR spectrum of compound 2 (CDCl<sub>3</sub>).

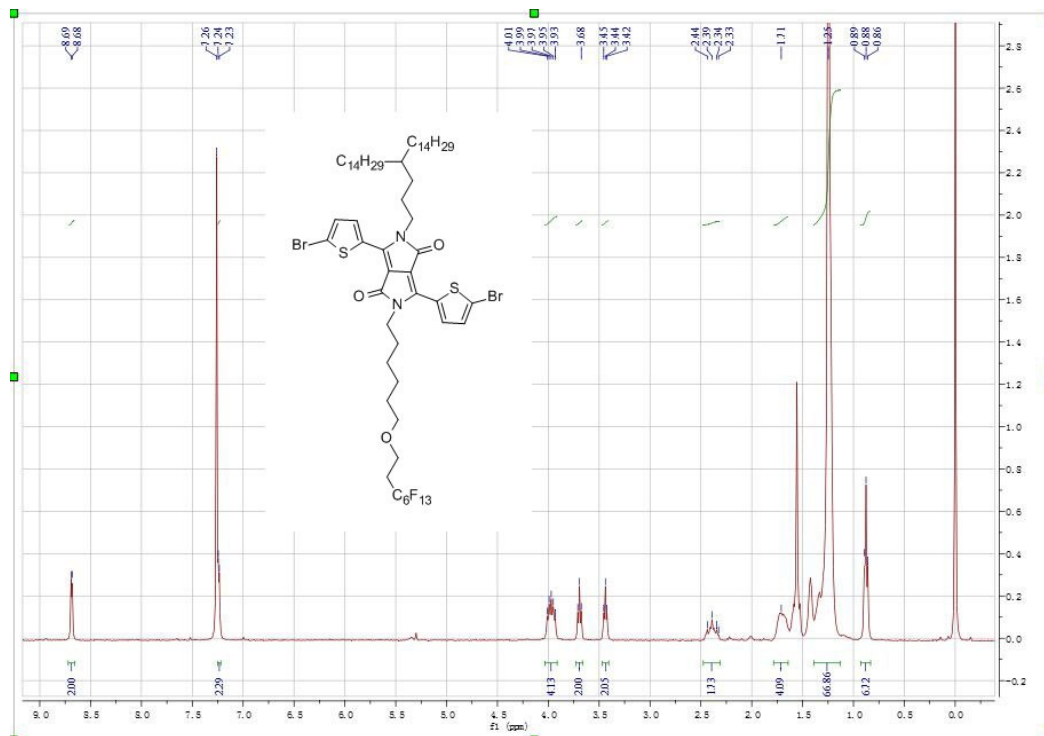

Figure S5  $^1\text{H}$  NMR spectrum of compound **3** ( $\text{CDCl}_3$ ).

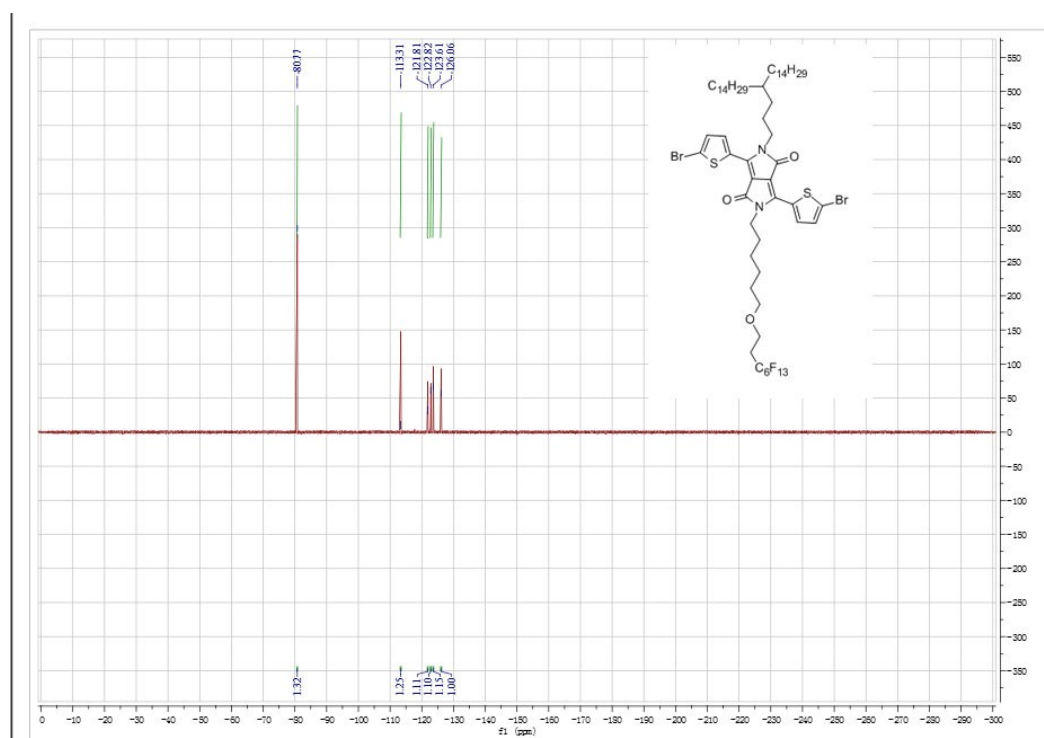

Figure S6  $^{19}\text{F}$  NMR spectrum of compound **3** ( $\text{CDCl}_3$ ).

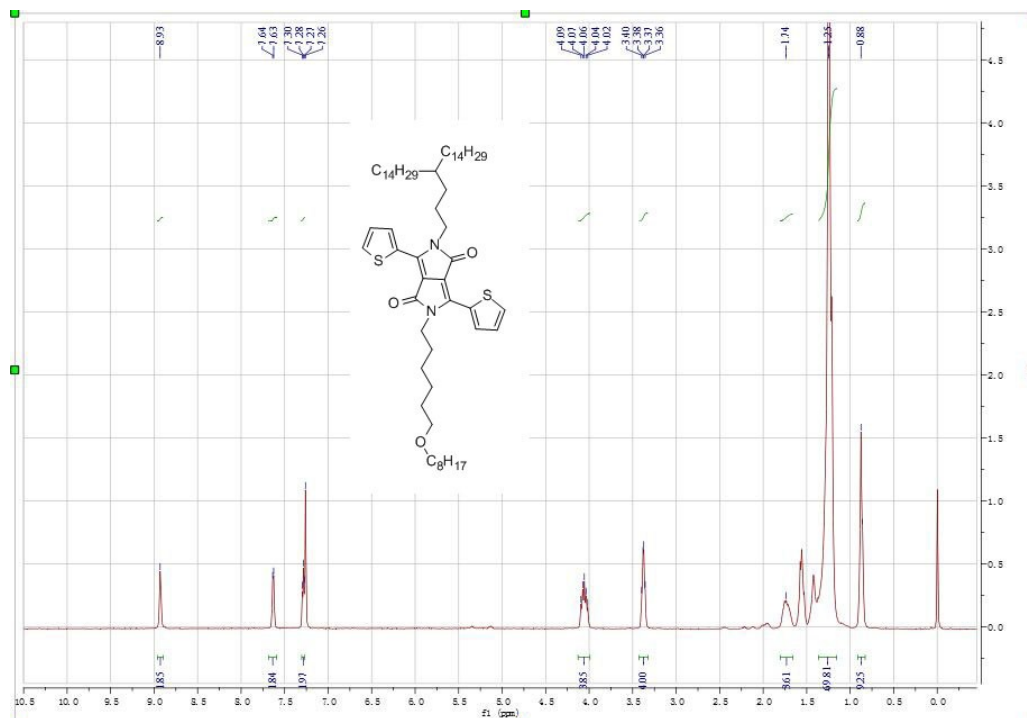

Figure S7 <sup>1</sup>H NMR spectrum of compound 4 (CDCl<sub>3</sub>).

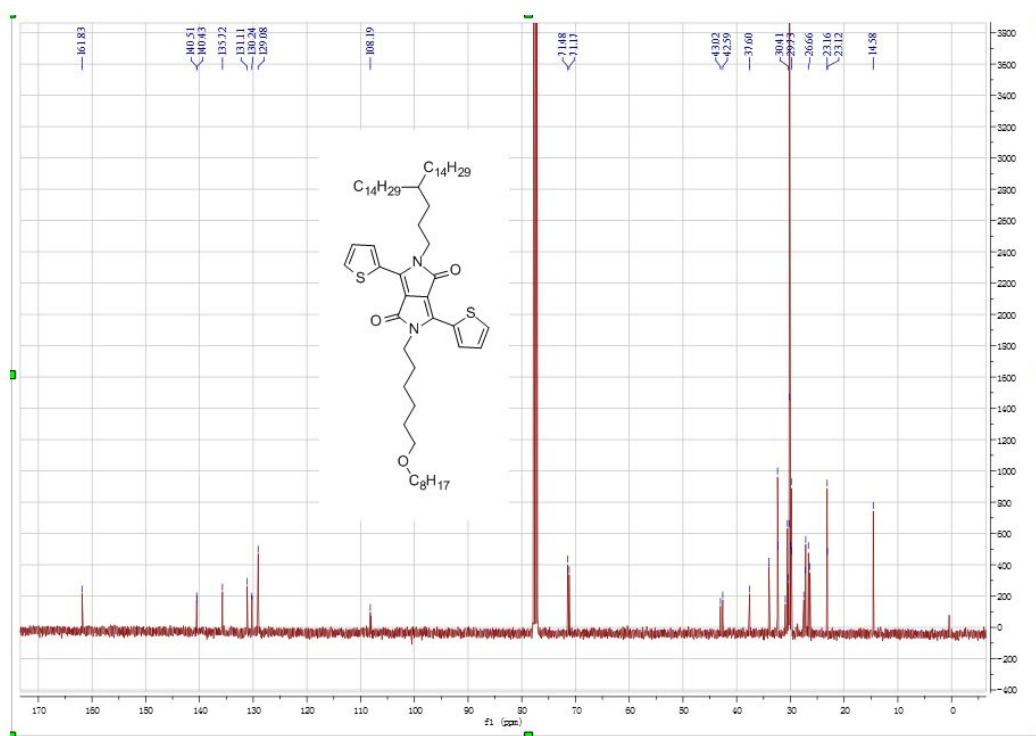

Figure S8 <sup>13</sup>C NMR spectrum of compound 4 (CDCl<sub>3</sub>).

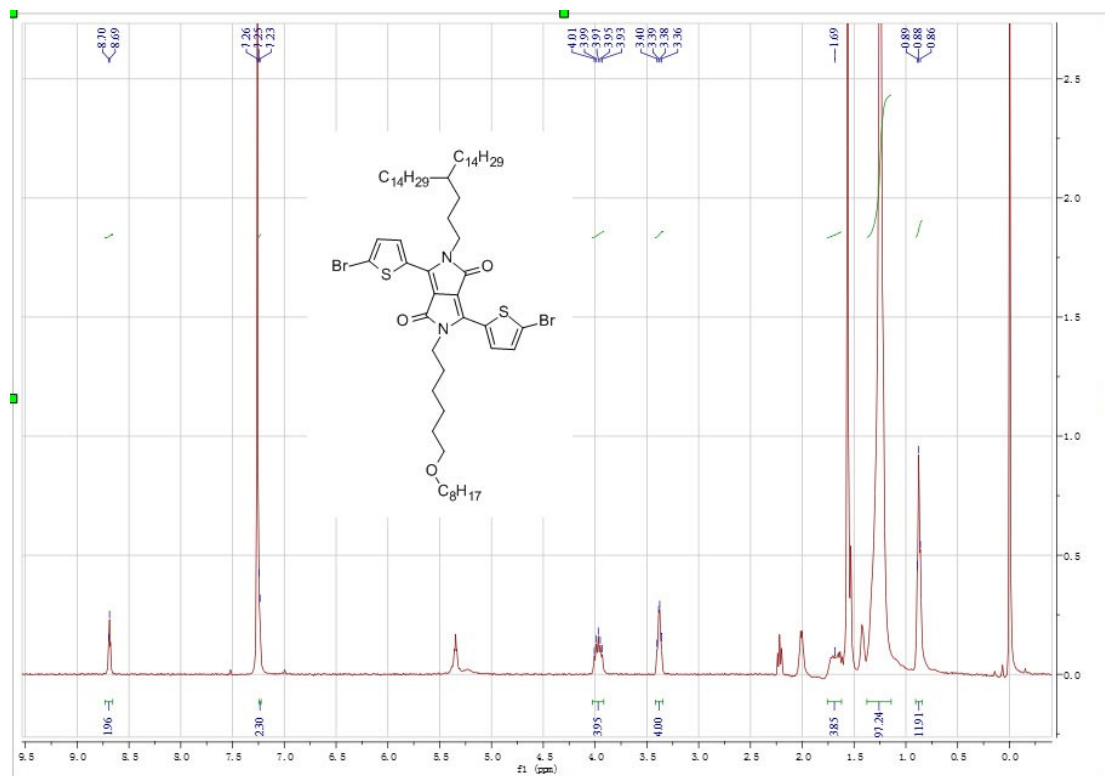

Figure S9 <sup>1</sup>H NMR spectrum of compound 5 (CDCl<sub>3</sub>).

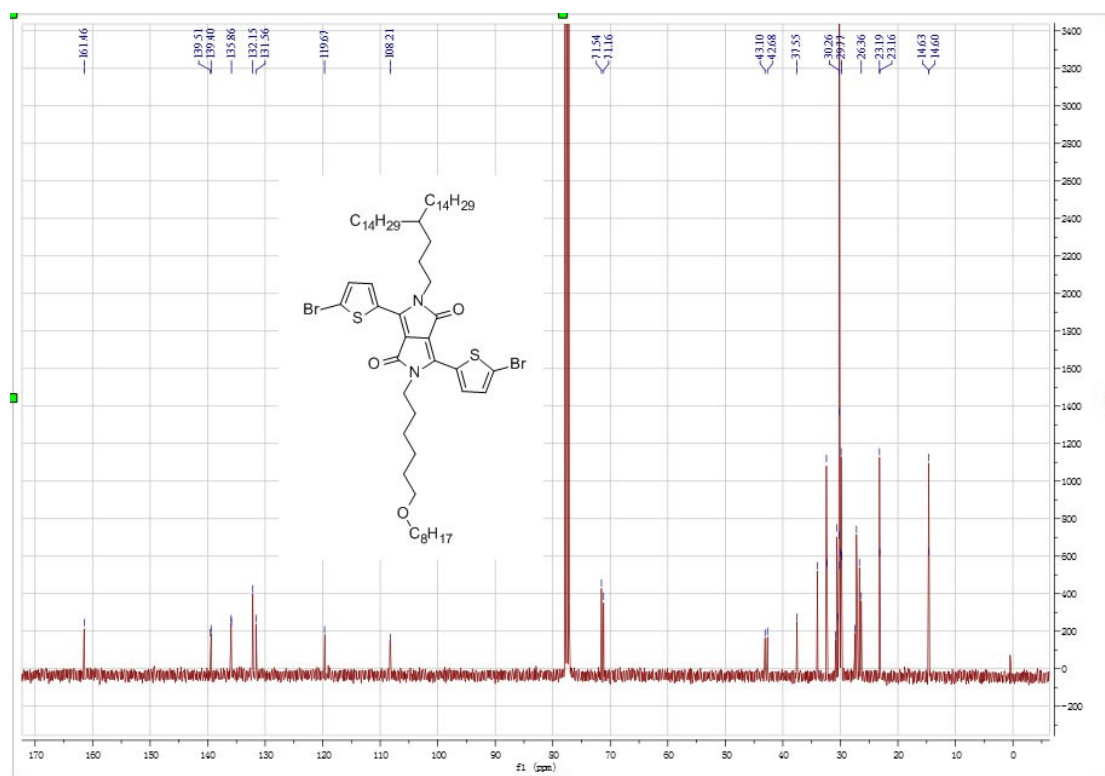

Figure S10 <sup>13</sup>C NMR spectrum of compound 5 (CDCl<sub>3</sub>).
